# Supplementary material for: Plankton food web structure and productivity under ocean alkalinity enhancement
Source: PubMed Central journal article supplement — Sci Adv. 2024 Dec 6;10(49):eado0264. doi: 10.1126/sciadv.ado0264 (PMC11623272; doi:10.1126/sciadv.ado0264), 2024-12-06
Supplement: sciadv.ado0264_sm.pdf [file sciadv.ado0264_sm.pdf]

Supplementary Materials for  
**Plankton food web structure and productivity under ocean  
alkalinity enhancement**

Nicolás Sánchez *et al.*

Corresponding author: Nicolás Sánchez, [nsanchez@geomar.de](mailto:nsanchez@geomar.de)

*Sci. Adv.* **10**, eado0264 (2024)  
DOI: 10.1126/sciadv.ado0264

**This PDF file includes:**

Figs. S1 to S4  
Tables S1 to S5

## Zooplankton properties

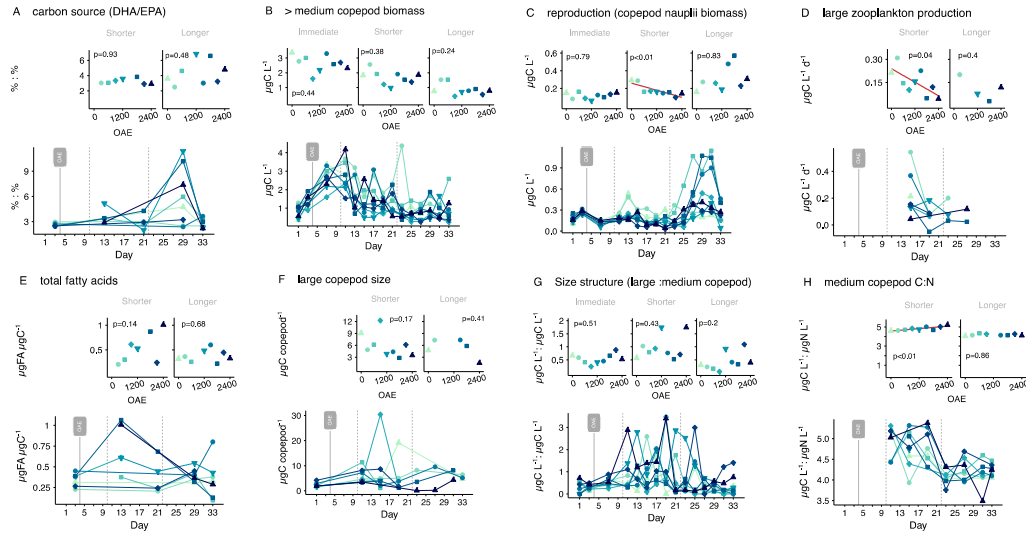

## Lower trophic level properties

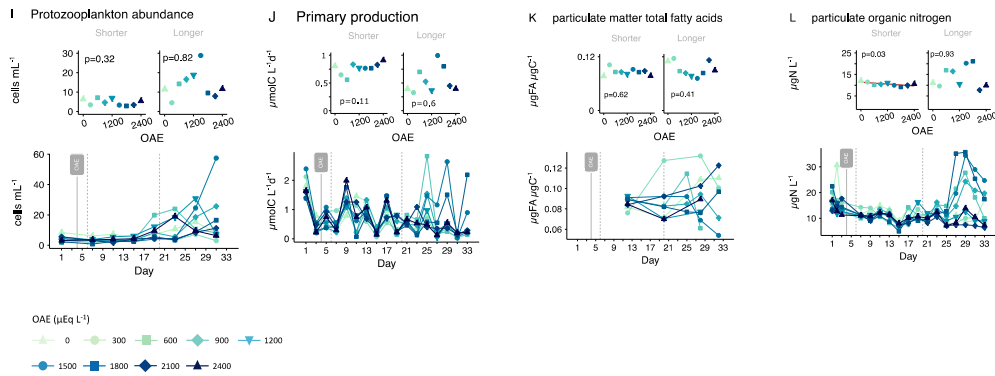

**Fig. S1. Continuation of Figure 1.**

Continuation of figure 1 reporting key metazoan zooplankton (A-H) and lower trophic level (I-L) responses to OAE. These responses are summarized in tables 1 and 2.

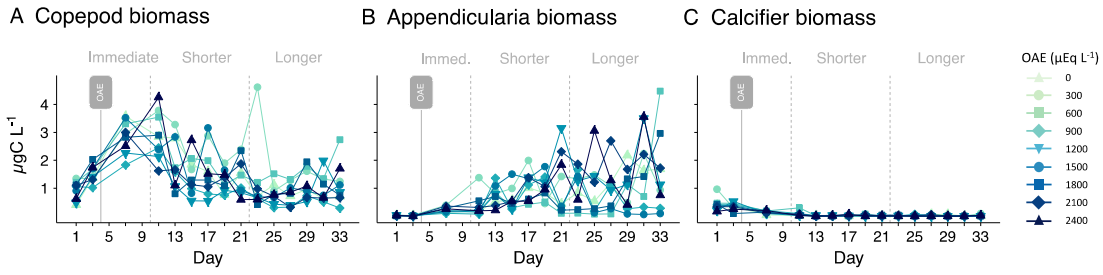

**Fig. S2. Metazoan zooplankton biomass development.**

Biomass development of key zooplankton groups, across size classes and development, under OAE. In the case of copepods, copepod nauplii are excluded.

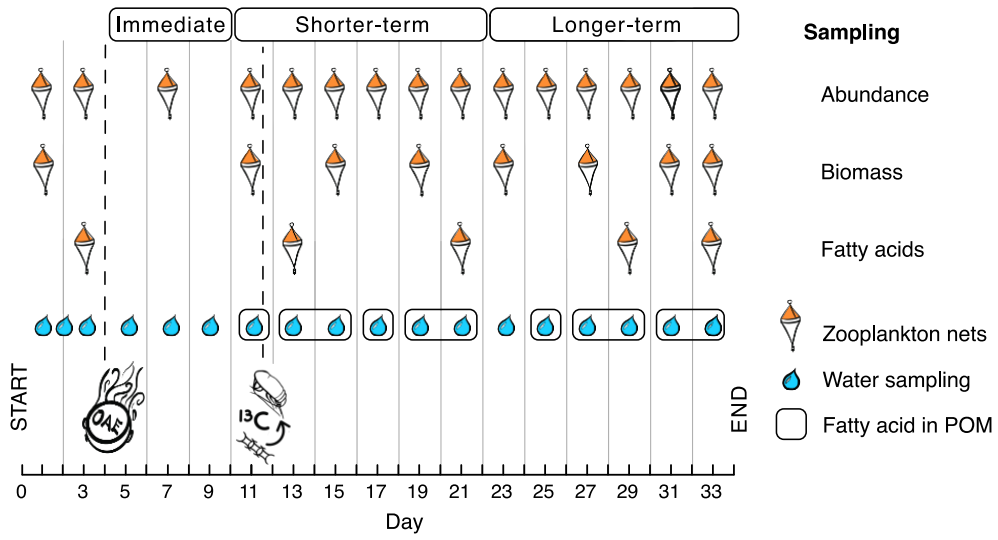

**Fig. S3. Experimental schedule.**

Experimental schedule including sampling of metazoan zooplankton and the water column, as well as OAE simulation and the enrichment in  $^{13}C$ , used to measure zooplankton production.

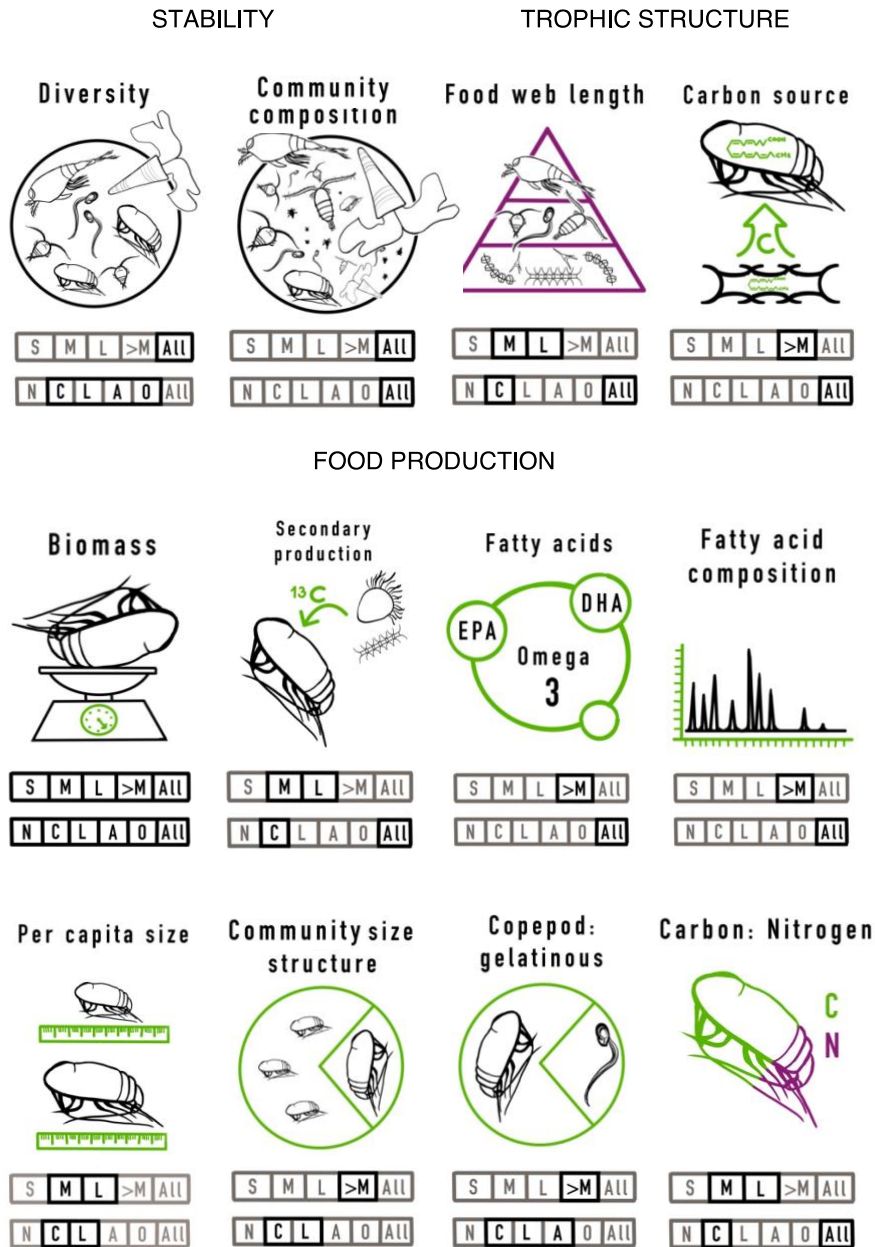

**Fig. S4. Metazoan zooplankton samples overview.**

Overview of zooplankton properties assessed, organized according to their food web implication. Green = carbon-based measurement, purple = nitrogen-based. Bar pairs underneath each symbol inform about the zooplankton size classes (upper bars) and taxonomic groups (lower bars) on which each property was assessed, indicated in black. When multiple size or taxonomic categories are enclosed together, these were measured together. Every marked taxon was assessed in every marked size class (factorially), except for production, which could only be measured in bulk zooplankton within the large size class, and except for copepod nauplii, which can only belong to the small size class. For the size bar: S = small, M = medium, L = large, >M = medium and large

together, All = all. For the taxon bar: N = copepod nauplii, C = copepod and copepodite, excluding *Labidocera*, L = *Labidocera*, A = Appendicularia, O = other zooplankton, All = all.

**Table S1. Summary of linear regressions for metazoan zooplankton responses to OAE.**

Zooplankton responses to OAE through different phases of adjustment. Here we report the statistical outputs from the linear regressions fitted to phase averages. All zooplankton (size, taxonomy and development) samples in which each response was assessed are included.

| FOOD WEB IMPLICATION      | ZOOPLANKTON PROPERTY    | SAMPLE             | PHASE           | STATISTICS |       |       |      |
|---------------------------|-------------------------|--------------------|-----------------|------------|-------|-------|------|
|                           |                         |                    |                 | df         | t     | p     |      |
| Stability                 | Diversity               | all zooplankton    | i               | 7          | -0.35 | 0.74  |      |
|                           |                         |                    | s               | 7          | 0.25  | 0.81  |      |
|                           |                         |                    | l               | 7          | -0.1  | 0.92  |      |
| Trophic structure         | Trophic level           | large zooplankton  | i               | 7          | 0.17  | 0.87  |      |
|                           |                         |                    | s               | 3          | 0.5   | 0.65  |      |
|                           |                         |                    | l               | 7          | 1.28  | 0.24  |      |
|                           | Carbon source           | medium zooplankton | i               | 7          | 0.5   | 0.63  |      |
|                           |                         |                    | s               | 7          | 0.66  | 0.53  |      |
|                           |                         |                    | l               | 6          | 0.79  | 0.46  |      |
| Food production: quantity | PUFA:SFA                | all zooplankton    | i               | 5          | -1.62 | 0.17  |      |
|                           |                         |                    | s               | 6          | -0.1  | 0.92  |      |
|                           |                         |                    | l               | 5          | -0.1  | 0.93  |      |
|                           | DHA:EPA                 | all zooplankton    | i               | 6          | 0.75  | 0.48  |      |
|                           |                         |                    | s               | 5          | -1.38 | 0.23  |      |
|                           |                         |                    | l               | 6          | -1    | 0.35  |      |
|                           | C18:1n-7                | all zooplankton    | i               | 7          | -0.75 | 0.48  |      |
|                           |                         |                    | s               | 7          | -0.75 | 0.48  |      |
|                           |                         |                    | l               | 7          | 0.06  | 0.95  |      |
|                           | Biomass                 | all appendicularia | all zooplankton | i          | 7     | 0.67  | 0.52 |
|                           |                         |                    |                 | s          | 7     | 0.25  | 0.81 |
|                           |                         |                    |                 | l          | 7     | 0.69  | 0.51 |
| all calcifiers            |                         | all zooplankton    | i               | 7          | 0.95  | 0.37  |      |
|                           |                         |                    | s               | 7          | -0.19 | 0.86  |      |
|                           |                         |                    | l               | 7          | -2.06 | 0.08  |      |
| all other zooplankton     |                         | all zooplankton    | i               | 7          | -1.62 | 0.15  |      |
|                           |                         |                    | s               | 7          | -2.17 | 0.07  |      |
|                           |                         |                    | l               | 7          | 0.33  | 0.75  |      |
| copepodites               |                         | all zooplankton    | i               | 7          | -1.06 | 0.33  |      |
|                           |                         |                    | s               | 7          | -0.59 | 0.57  |      |
|                           |                         |                    | l               | 7          | -0.91 | 0.4   |      |
| adult copepod             | all zooplankton         | i                  | 7               | 1.32       | 0.23  |       |      |
|                           |                         | s                  | 7               | -1.76      | 0.12  |       |      |
|                           |                         | l                  | 7               | -2.01      | 0.08  |       |      |
| Labidocera                | all zooplankton         | i                  | 7               | -0.12      | 0.91  |       |      |
|                           |                         | s                  | 7               | 1.7        | 0.13  |       |      |
|                           |                         | l                  | 7               | -1.03      | 0.34  |       |      |
| >medium zooplankton       | all zooplankton         | i                  | 7               | -0.58      | 0.58  |       |      |
|                           |                         | s                  | 7               | -0.13      | 0.9   |       |      |
|                           |                         | l                  | 7               | -0.13      | 0.9   |       |      |
| >medium copepods          | all zooplankton         | i                  | 7               | -0.82      | 0.44  |       |      |
|                           |                         | s                  | 7               | -0.95      | 0.38  |       |      |
|                           |                         | l                  | 7               | -1.29      | 0.24  |       |      |
| Reproduction              | copepod nauplii biomass | all zooplankton    | i               | 7          | 0.28  | 0.79  |      |
|                           |                         |                    | s               | 7          | -4.08 | <0.01 |      |
|                           |                         |                    | l               | 7          | 0.22  | 0.83  |      |
| Production                | large zooplankton       | all zooplankton    | i               | 7          | -2.54 | 0.04  |      |
|                           |                         |                    | s               | 2          | -1.07 | 0.4   |      |
|                           |                         |                    | l               | 7          | -2.26 | 0.06  |      |
| medium zooplankton        | all zooplankton         | i                  | 7               | -1.06      | 0.33  |       |      |
|                           |                         | s                  | 6               | -2.28      | 0.06  |       |      |
|                           |                         | l                  | 6               | -1.78      | 0.13  |       |      |
| medium copepod            | all zooplankton         | i                  | 5               | 1.74       | 0.14  |       |      |
|                           |                         | s                  | 6               | 0.44       | 0.68  |       |      |
|                           |                         | l                  | 5               | -0.1       | 0.93  |       |      |
| Fatty acids               | DHA:EPA                 | all zooplankton    | i               | 6          | 0.75  | 0.48  |      |
|                           |                         |                    | s               | 5          | 0.75  | 0.49  |      |
|                           |                         |                    | l               | 6          | 0.17  | 0.87  |      |
| PUFAs                     | all zooplankton         | i                  | 5               | 0.75       | 0.49  |       |      |
|                           |                         | s                  | 6               | 0.17       | 0.87  |       |      |
|                           |                         | l                  | 5               | 0.75       | 0.49  |       |      |
| Size                      | large copepod           | all zooplankton    | i               | 7          | -1.52 | 0.17  |      |
|                           |                         |                    | s               | 3          | -0.95 | 0.41  |      |
|                           |                         |                    | l               | 7          | 1.44  | 0.25  |      |
|                           | large <i>Labidocera</i> | all zooplankton    | i               | 3          | -0.45 | 0.7   |      |
|                           |                         |                    | s               | 2          | 0.4   | 0.7   |      |
|                           |                         |                    | l               | 7          | 0.44  | 0.67  |      |
| medium copepod            | all zooplankton         | i                  | 7               | 0.4        | 0.7   |       |      |
|                           |                         | s                  | 7               | -0.13      | 0.9   |       |      |
|                           |                         | l                  | 7               | -1.72      | 0.13  |       |      |
| medium <i>Temora</i>      | all zooplankton         | i                  | 7               | 0.69       | 0.51  |       |      |
|                           |                         | s                  | 7               | 0.83       | 0.43  |       |      |
|                           |                         | l                  | 7               | 1.44       | 0.2   |       |      |
| Size structure            | Large: medium copepod   | all zooplankton    | i               | 7          | -0.62 | 0.56  |      |
|                           |                         |                    | s               | 7          | -0.53 | 0.61  |      |
|                           |                         |                    | l               | 7          | -0.29 | 0.78  |      |
| Copepod: gelatinous       | >medium zooplankton     | all zooplankton    | i               | 7          | -0.38 | 0.72  |      |
|                           |                         |                    | s               | 3          | -0.2  | 0.86  |      |
|                           |                         |                    | l               | 7          | 1.89  | 0.1   |      |
| Carbon: nitrogen          | large zooplankton       | all zooplankton    | i               | 7          | 3.3   | 0.01  |      |
|                           |                         |                    | s               | 7          | 3.3   | 0.01  |      |
|                           |                         |                    | l               | 7          | 3.84  | <0.01 |      |
| medium zooplankton        | all zooplankton         | i                  | 6               | 0.18       | 0.86  |       |      |
|                           |                         | s                  | 6               | 0.18       | 0.86  |       |      |
|                           |                         | l                  | 6               | 0.18       | 0.86  |       |      |

**Table S2. Summary of linear regressions of metazoan zooplankton biomass and fatty acid composition to OAE.**

Zooplankton biomass (A) and fatty acid (B) composition responses to OAE. We fitted linear regressions to the calculated ecological (based on Bray-Curtis dissimilarity) and environmental distances (based on Euclidean distance) to quantitatively assess the effect of OAE on these multivariate data sets. We further tested for a correlation between the environmental and ecological distances using Mantel tests. In both cases we established a  $p > 0.05$  as non-significant. Response phases: i = immediate, s = shorter-term, l = longer-term.

| Zooplankton response   | Phase | OAE effect (linear regressions) |       |      | Mantel test |      |
|------------------------|-------|---------------------------------|-------|------|-------------|------|
|                        |       | df                              | t     | p    | r           | p    |
| Community composition  | i     | 34                              | -0.1  | 0.93 | 0.01        | 0.47 |
|                        | s     | 34                              | -0.45 | 0.66 | 0.03        | 0.42 |
|                        | l     | 34                              | -1.09 | 0.28 | -0.15       | 0.8  |
| Fatty acid composition | s     | 19                              | 0.91  | 0.38 | 0.13        | 0.21 |
|                        | l     | 26                              | -1.49 | 0.15 | -0.24       | 0.62 |



**Table S3. Equations used in the study.**

Here we report on the series of equations and transformations applied to calculate selected food web parameters presented in this study. Further details on how we applied these formulas can be found in the materials and methods sections. ZP = metazoan zooplankton, POM = particulate organic matter, prosome = anterior region of the body of invertebrates (in copepods, roughly corresponds to the bulk of the biomass).

| PROPERTY                   | MEASUREMENT (units)                          | EQUATION                                                                                                                                                 | VARIABLES                                                                                                                                                                                                                                                                                                                                           | SOURCE |
|----------------------------|----------------------------------------------|----------------------------------------------------------------------------------------------------------------------------------------------------------|-----------------------------------------------------------------------------------------------------------------------------------------------------------------------------------------------------------------------------------------------------------------------------------------------------------------------------------------------------|--------|
|                            | Biovolume ( $mm^3$ )                         | $= \frac{4}{3} \Pi \frac{PL}{2} \frac{PW}{2} \frac{PH}{2}$                                                                                               | PL = prosome length (mm)<br>PW = prosome width (mm)<br>PH = prosome height (same as PW)                                                                                                                                                                                                                                                             |        |
| 1. COPEPOD PER CAPITA SIZE | Wet mass ( $\mu g$ )                         | $= (1.024 * biovolume)1000$                                                                                                                              | 1.024 = seawater gravity ( $gcm^{-3}$ ) at 22°C; assumed similar to copepods <sup>7</sup>                                                                                                                                                                                                                                                           | 14     |
|                            | Dry mass ( $\mu g$ )                         | $= 0.162 * wetmass$                                                                                                                                      | 0.162 = constant                                                                                                                                                                                                                                                                                                                                    |        |
|                            | C mass ( $\mu g$ )                           | $= 0.48 * drymass$                                                                                                                                       | 0.48 = constant                                                                                                                                                                                                                                                                                                                                     |        |
| 2. DIVERSITY               | Shannon index (H')                           | $= -1 \sum (p_i (\ln p_i))$                                                                                                                              | $p_i$ = taxon-specific biomass relative to total biomass<br>$\ln p_i$ = natural log of $p_i$                                                                                                                                                                                                                                                        |        |
| 3. FOOD WEB LENGTH         | Zooplankton trophic level ( $\delta^{15}N$ ) | $= ZP\delta^{15}N_t - POM\delta^{15}N_{t \rightarrow t-1}$                                                                                               | $ZP\delta^{15}N_t$ = zooplankton $\delta^{15}N$ on sampling day $t$<br>$POM\delta^{15}N_{t \rightarrow t-1}$ = mean POM $\delta^{15}N$ across sampling days $t$ and the previous one                                                                                                                                                                |        |
| 4. SECONDARY PRODUCTION    | AT% <sup>13</sup> C                          | $= \frac{X}{X+1} 100$                                                                                                                                    | $X = (\frac{\delta^{13}C}{1000} + 1) 0.0111802$                                                                                                                                                                                                                                                                                                     | 73     |
|                            | Production ( $\mu gCL^{-1}d^{-1}$ )          | $= \frac{ZPAT\%^{13}C_t - ZPAT\%^{13}C_{t_0}}{POMAT\%^{13}C_{t_0 \rightarrow t} - ZPAT\%^{13}C_{t_0}} \frac{ZPbiomass_{t \rightarrow t \pm 1}}{t - t_0}$ | $ZPAT\%^{13}C_t$ = ZP enrichment on day $t$<br>$ZPAT\%^{13}C_{t_0}$ = ZP baseline enrichment<br>$POMAT\%^{13}C_{t_0 \rightarrow t}$ = mean POM enrichment of measurements between $t_0$ and $t$<br>$ZPbiomass_{t \rightarrow t \pm 1}$ = mean ZP biomass ( $\mu gCL^{-1}$ ) at $t$ and the sampling days directly before and after $t - t_0$ = days |        |
| 5. COMMUNITY COMPOSITION   | Normalized zooplankton biomass               | $= \frac{ZPbiomass - ZPbiomass_{min}}{ZPbiomass_{max} - ZPbiomass_{min}}$                                                                                | $ZPbiomass$ = biomass of each ZP group<br>$ZPbiomass_{min}$ = minimum biomass for each group, per treatment and across time<br>$ZPbiomass_{max}$ = maximum biomass for each group, per treatment and across time                                                                                                                                    | 87     |

**Table S4. Metazoan zooplankton biomass conversion factors.**

Compilation of all zooplankton biomass conversion factors ( $\mu\text{gC}$  per ind) applied to calculate zooplankton biomass ( $\mu\text{gC}$  per L) from their abundances (ind per L). Factors were averaged from ZP carbon biomass measured either directly in an elemental analyzer, or indirectly via image-based carbon calculations, depending on sample availability. This table presents factors for ZP groups that both contributed to more than 0.1% of total biomass and that were found on more than two time points, per treatment. Abundances were resolved to a more detailed taxonomic and developmental level than biomass measurements, which is why in many case the same factor is applied to multiple count groups. In most cases, no temporal trends were observed in per capita biomass, so factors are calculated on average values for the whole experiment.

<sup>1</sup>Small copepod(ite) factors are calculated by subtracting the average (across treatments and time) copepod nauplii biomass from the average small bulk ZP biomass from the Gran Canaria 2019 mesocosm campaign. Both campaigns took place in the same location and season, and followed the same sampling strategy. <sup>2</sup>Small gelatinous ZP factors used came from the average small Appendicularia biomass from the Gran Canaria 2019 mesocosm campaign. <sup>3</sup>Large copepod(ite) factors were calculated both from copepod and selected bulk zooplankton samples which only contained copepods. <sup>4</sup>Large *Labidocera* factors were calculated from individuals sampled both in the water column and in the sediment traps, as we did not observe consistent biomass differences according to origin. Grey color = factor applied was averaged across all treatments.

| SIZE   | COUNT GROUP                                                                                                                                    | BIOMASS GROUP       | METHOD                             | OAE ( $\mu\text{EqL}^{-1}$ ) | FACTOR ( $\mu\text{gCind}^{-1}$ ) |         |        |
|--------|------------------------------------------------------------------------------------------------------------------------------------------------|---------------------|------------------------------------|------------------------------|-----------------------------------|---------|--------|
|        |                                                                                                                                                |                     |                                    |                              | immediate                         | shorter | longer |
| all    | copepod<br>nauplii                                                                                                                             | copepod<br>nauplii  | elemental<br>analyzer              | 0                            | 0.029                             |         | 0.024  |
|        |                                                                                                                                                |                     |                                    | 300                          |                                   |         | 0.027  |
|        |                                                                                                                                                |                     |                                    | 600                          |                                   |         | 0.03   |
|        |                                                                                                                                                |                     |                                    | 900                          |                                   |         | 0.025  |
|        |                                                                                                                                                |                     |                                    | 1200                         |                                   |         | 0.034  |
|        |                                                                                                                                                |                     |                                    | 1500                         |                                   |         | 0.032  |
|        |                                                                                                                                                |                     |                                    | 1800                         |                                   |         | 0.032  |
|        |                                                                                                                                                |                     |                                    | 2100                         |                                   |         | 0.029  |
|        |                                                                                                                                                |                     |                                    | 2400                         |                                   |         | 0.029  |
| small  | Calanoid<br><i>Oithona</i><br><i>Oncaea</i><br><i>Temora</i>                                                                                   | copepod(ite)        | elemental<br>analyzer <sup>1</sup> | all                          |                                   |         | 0.089  |
| small  | <i>Oikopleura</i><br><i>Obelia</i>                                                                                                             | Appendicularia      | elemental<br>analyzer <sup>2</sup> | all                          |                                   |         | 0.089  |
| small  | Foraminifera<br>Gastropoda<br>Pteropoda<br>Radiolaria                                                                                          | bulk<br>zooplankton | elemental<br>analyzer              | all                          |                                   |         | 0.066  |
| medium | Calanoid<br><i>Corycaeus</i><br><i>Microsetella</i><br><i>Oithona</i><br><i>Oncaea</i><br><i>Paracalanus</i><br><i>Temora</i><br>Harpacticoida | copepod(ite)        | elemental<br>analyzer              | 0                            |                                   |         | 1.054  |
|        |                                                                                                                                                |                     |                                    | 300                          |                                   |         | 1.193  |
|        |                                                                                                                                                |                     |                                    | 600                          |                                   |         | 1.234  |
|        |                                                                                                                                                |                     |                                    | 900                          |                                   |         | 0.981  |
|        |                                                                                                                                                |                     |                                    | 1200                         |                                   |         | 1.072  |
|        |                                                                                                                                                |                     |                                    | 1500                         |                                   |         | 1.086  |
|        |                                                                                                                                                |                     |                                    | 1800                         |                                   |         | 1.145  |
|        |                                                                                                                                                |                     |                                    | 2100                         |                                   |         | 0.901  |
| 2400   |                                                                                                                                                |                     | 0.763                              |                              |                                   |         |        |
| medium | <i>Oikopleura</i><br><i>Obelia</i>                                                                                                             | Appendicularia      | images                             | 0                            |                                   |         | 0.117  |
|        |                                                                                                                                                |                     |                                    | 300                          |                                   |         | 0.114  |
|        |                                                                                                                                                |                     |                                    | 600                          |                                   |         | 0.13   |
|        |                                                                                                                                                |                     |                                    | 900                          |                                   |         | 0.133  |
|        |                                                                                                                                                |                     |                                    | 1200                         |                                   |         | 0.123  |
|        |                                                                                                                                                |                     |                                    | 1500                         |                                   |         | 0.247  |
|        |                                                                                                                                                |                     |                                    | 1800                         |                                   |         | 0.138  |
|        |                                                                                                                                                |                     |                                    | 2100                         |                                   |         | 0.181  |
| 2400   |                                                                                                                                                |                     | 0.144                              |                              |                                   |         |        |

table continued in the next page

| SIZE   | COUNT GROUP                                                                                              | BIOMASS GROUP       | METHOD                             | OAE ( $\mu EqL^{-1}$ ) | FACTOR ( $\mu gCind^{-1}$ ) |                |               |
|--------|----------------------------------------------------------------------------------------------------------|---------------------|------------------------------------|------------------------|-----------------------------|----------------|---------------|
|        |                                                                                                          |                     |                                    |                        | <i>immediate</i>            | <i>shorter</i> | <i>longer</i> |
| medium | Foraminifera<br>Gastropoda<br>Pteropoda<br>Radiolaria<br>Pluteus                                         | bulk<br>zooplankton | elemental<br>analyzer              | 0                      |                             |                | 0.564         |
|        |                                                                                                          |                     |                                    | 300                    |                             |                | 0.598         |
|        |                                                                                                          |                     |                                    | 600                    |                             |                | 0.766         |
|        |                                                                                                          |                     |                                    | 900                    |                             |                | 0.694         |
|        |                                                                                                          |                     |                                    | 1200                   |                             |                | 0.712         |
|        |                                                                                                          |                     |                                    | 1500                   |                             |                | 0.826         |
|        |                                                                                                          |                     |                                    | 1800                   |                             |                | 0.672         |
|        |                                                                                                          |                     |                                    | 2100                   |                             |                | 0.686         |
|        |                                                                                                          |                     | 2400                               |                        |                             | 0.58           |               |
| large  | Calanoid<br><i>Centropages</i><br><i>Oithona</i><br><i>Oncaea</i><br><i>Paracalanus</i><br><i>Temora</i> | copepod(ite)        | elemental<br>analyzer <sup>3</sup> | all                    |                             |                | 5.058         |
|        |                                                                                                          |                     |                                    |                        |                             |                |               |
|        |                                                                                                          |                     |                                    |                        |                             |                |               |
|        |                                                                                                          |                     |                                    |                        |                             |                |               |
|        |                                                                                                          |                     |                                    |                        |                             |                |               |
| large  | <i>Oikopleura</i>                                                                                        | Appendicularia      | images                             | 0                      |                             |                | 0.137         |
|        |                                                                                                          |                     |                                    | 300                    |                             |                | 0.369         |
|        |                                                                                                          |                     |                                    | 600                    |                             |                | 0.226         |
|        |                                                                                                          |                     |                                    | 900                    |                             |                | 0.339         |
|        |                                                                                                          |                     |                                    | 1200                   |                             |                | 0.201         |
|        |                                                                                                          |                     |                                    | 1500                   |                             |                | 0.284         |
|        |                                                                                                          |                     |                                    | 1800                   |                             |                | 0.1           |
|        |                                                                                                          |                     |                                    | 2100                   |                             |                | 0.361         |
|        |                                                                                                          |                     | 2400                               |                        |                             | 0.126          |               |
| large  | Foraminifera<br>Gastropoda<br>Pteropoda<br>Radiolaria                                                    | bulk<br>zooplankton | elemental<br>analyzer              | 0                      |                             |                | 3.687         |
|        |                                                                                                          |                     |                                    | 300                    |                             |                | 6.023         |
|        |                                                                                                          |                     |                                    | 600                    |                             |                | 3.687         |
|        |                                                                                                          |                     |                                    | 900                    |                             |                | 3.687         |
|        |                                                                                                          |                     |                                    | 1200                   |                             |                | 3.891         |
|        |                                                                                                          |                     |                                    | 1500                   |                             |                | 2.017         |
|        |                                                                                                          |                     |                                    | 1800                   |                             |                | 3.922         |
|        |                                                                                                          |                     |                                    | 2100                   |                             |                | 3.687         |
|        |                                                                                                          |                     | 2400                               |                        |                             | 3.954          |               |
| large  | <i>Labidocera</i>                                                                                        | <i>Labidocera</i>   | elemental<br>analyzer <sup>4</sup> | all                    |                             |                | 34.209        |

**Table S5. Metazoan zooplankton fatty acids.**

Abundant (contributing more than 0.1% to total for each sample) fatty acids (%) measured in zooplankton. Phase average values are reported (S = shorter-term, L = longer-term). Saturated (SFA), monounsaturated (MUFA) and polyunsaturated (PUFA) fatty acids were calculated from the individual fatty acids listed in this table. blank = no data, - = below 0.1% threshold.

| FATTY ACID<br>FORMULA | MEAN FA (%) |             |            |             |             |             |             |            |             |             |             |             |             |             |            |   |      |   |  |
|-----------------------|-------------|-------------|------------|-------------|-------------|-------------|-------------|------------|-------------|-------------|-------------|-------------|-------------|-------------|------------|---|------|---|--|
|                       | 0           |             | 300        |             | 600         |             | 900         |            | 1200        |             | 1500        |             | 1800        |             | 2100       |   | 2400 |   |  |
|                       | S           | L           | S          | L           | S           | L           | S           | L          | S           | L           | S           | L           | S           | L           | S          | L | S    | L |  |
| C12:0                 | 0.4         | 0.6         | 0.7        | 0.6         | 0.3         | 0.2         | 1.6         | -          | 0.4         | 0.7         | 0.5         | 0.4         | 0.4         | -           | 0.5        |   |      |   |  |
| C14:0                 | 2.3         | 3           | 2.7        | 1.4         | 1.8         | 1.1         | 1.6         | 2.3        | 3.4         | 1           | 2.6         | 1.5         | 1.7         | 1.1         | 2.1        |   |      |   |  |
| C14:1, 2OH-C10:0      | -           | 0.1         | 0.1        | -           | -           | -           | -           | -          | 0.2         | -           | -           | -           | -           | -           | 0.2        |   |      |   |  |
| C15:0                 | -           | 0.9         | -          | 0.4         | -           | -           | 0.3         | -          | -           | 0.3         | -           | -           | 0.4         | 0.3         | -          |   |      |   |  |
| C16:0                 | 50.5        | 43.3        | 49.1       | 51.6        | 51.7        | 51.8        | 52.9        | 50.2       | 64.3        | 51.9        | 47.6        | 52.1        | 51.3        | 51.2        | 46.8       |   |      |   |  |
| C16:1                 | 0.7         | 1.7         | 1.5        | 0.4         | 0.3         | 0.3         | 0.3         | 0.9        | 1.5         | 0.3         | 0.5         | 0.4         | 0.7         | 0.3         | 0.8        |   |      |   |  |
| C16:3n-4              | 0.2         | 1.1         | -          | 0.4         | -           | 0.4         | 0.6         | -          | 0.2         | 0.3         | -           | 0.8         | -           | 0.5         | -          |   |      |   |  |
| C17:0                 | 0.3         | 1.2         | 0.4        | 0.4         | 0.3         | 0.4         | 0.3         | 0.2        | 0.3         | 0.3         | 0.5         | 0.4         | -           | 0.3         | 0.3        |   |      |   |  |
| C17:1; 3-OH-C12       | -           | -           | 0.2        | -           | -           | -           | -           | -          | 0.4         | -           | -           | -           | -           | -           | -          |   |      |   |  |
| C18:0; C18:1n9t       | 31.7        | 27.4        | 30.8       | 35.2        | 33.4        | 35.5        | 32.8        | 30.4       | 31.2        | 36.6        | 30.2        | 35.4        | 33.3        | 36.4        | 39         |   |      |   |  |
| C18:1n7c              | 0.8         | 1.5         | 1.2        | 0.3         | 2.4         | 0.2         | 0.3         | 0.8        | 0.6         | 0.3         | 0.9         | 0.3         | 0.6         | 0.2         | 0.5        |   |      |   |  |
| C18:1n9c              | 4.7         | 4.4         | 5.3        | 4.9         | 4.7         | 4.8         | 4.7         | 4.6        | 4.8         | 4.6         | 4.3         | 4.9         | 4.5         | 4.5         | 3.3        |   |      |   |  |
| C18:2n6c              | 0.9         | 0.8         | 0.9        | 0.5         | 0.6         | 0.5         | 0.5         | 1.1        | 1.4         | 0.5         | 0.9         | 0.5         | -           | 0.5         | 0.5        |   |      |   |  |
| C18:3n3               | 0.5         | -           | 0.2        | -           | 0.5         | -           | -           | 0.8        | 0.3         | -           | 0.4         | -           | -           | -           | 0.2        |   |      |   |  |
| C18:3n6               | 0.3         | -           | 0.3        | 0.2         | 0.2         | -           | -           | 0.3        | 0.2         | -           | 0.3         | -           | 0.2         | 0.1         | 0.3        |   |      |   |  |
| C20:0                 | 0.4         | 0.3         | 0.4        | 0.4         | 0.3         | 0.4         | 0.3         | 0.3        | 0.4         | 0.3         | 0.4         | 0.4         | 0.4         | 0.4         | 0.4        |   |      |   |  |
| C20:1n9c              | 0.2         | -           | -          | -           | 0.3         | -           | -           | 0.2        | 0.2         | 0.3         | 0.3         | -           | -           | -           | 0.5        |   |      |   |  |
| C20:2n6c              | -           | -           | -          | -           | -           | -           | -           | 0.2        | -           | -           | -           | -           | -           | -           | -          |   |      |   |  |
| C20:3n6               | -           | 0.1         | -          | -           | -           | -           | -           | 0.3        | 0.7         | -           | -           | -           | -           | -           | -          |   |      |   |  |
| C20:4n6c              | 0.2         | 0.2         | 0.2        | 0.1         | 0.1         | -           | -           | 0.3        | 0.3         | 0.1         | 0.3         | -           | 0.1         | 0.1         | 0.2        |   |      |   |  |
| C20:5n3c              | 1.3         | 3           | 2          | 0.8         | 0.9         | 0.7         | 0.9         | 1          | 2.4         | 0.7         | 2           | 0.7         | 1.5         | 0.9         | 0.6        |   |      |   |  |
| C22:0                 | 1.7         | -           | -          | -           | 1.7         | -           | -           | 2.8        | -           | -           | 1.6         | -           | -           | -           | 2.3        |   |      |   |  |
| C22:1n9c              | 0.3         | 0.4         | 0.4        | 0.4         | 0.2         | 0.4         | 0.3         | 0.2        | 0.2         | 0.3         | 0.5         | 0.2         | -           | 0.5         | 0.2        |   |      |   |  |
| C22:6n3               | 4.1         | 9.2         | 4.9        | 2.6         | 3.7         | 2.4         | 3.4         | 5          | 6.5         | 2.3         | 7.8         | 2           | 4.9         | 2.5         | 3.3        |   |      |   |  |
| C23:0                 | -           | -           | -          | -           | -           | -           | -           | -          | -           | -           | 0.2         | -           | -           | -           | -          |   |      |   |  |
| C24:0                 | 0.3         | 0.3         | 0.4        | -           | 0.3         | -           | -           | 0.2        | 0.4         | 0.1         | 0.4         | -           | -           | -           | -          |   |      |   |  |
| C24:1; C22:5n3        | 0.2         | 0.4         | -          | 0.1         | 0.1         | 0.2         | 0.1         | 0.2        | 0.2         | -           | 0.3         | 0.1         | -           | 0.1         | 0.2        |   |      |   |  |
| <b>SFAs</b>           | <b>86.5</b> | <b>77</b>   | <b>84</b>  | <b>89.8</b> | <b>88.9</b> | <b>89.9</b> | <b>89.7</b> | <b>85</b>  | <b>84.6</b> | <b>90.7</b> | <b>82.5</b> | <b>90.2</b> | <b>87.4</b> | <b>89.7</b> | <b>90</b>  |   |      |   |  |
| <b>MUFAs</b>          | <b>6.3</b>  | <b>7.9</b>  | <b>8.2</b> | <b>5.6</b>  | <b>5.3</b>  | <b>5.8</b>  | <b>5.3</b>  | <b>6.5</b> | <b>4.5</b>  | <b>5.4</b>  | <b>6.3</b>  | <b>5.7</b>  | <b>5.8</b>  | <b>5.5</b>  | <b>5</b>   |   |      |   |  |
| <b>PUFAs</b>          | <b>7.2</b>  | <b>14.5</b> | <b>7.6</b> | <b>4.5</b>  | <b>5.8</b>  | <b>4.1</b>  | <b>5</b>    | <b>8.4</b> | <b>10.4</b> | <b>3.9</b>  | <b>11.1</b> | <b>4</b>    | <b>6.7</b>  | <b>4.6</b>  | <b>4.8</b> |   |      |   |  |
